# Supplementary material
Source: PubMed Central journal article supplement (PMC3392178)
Supplement: NIHMS386207-supplement-supplement_1.pdf [file NIHMS386207-supplement-supplement_1.pdf]

**Table S1.** Known copy number variations in humans. Included are the variation ID from the Database of Genomic Variants, *ALDH* family member, type (CNV – copy number variation with changes > 1 kb; InDel – insertions and deletions with changes 100–999 bp; inv – inversions with changes that invert the nucleotide sequence), whether the change was a loss or gain, site (intron – change only affects an intronic region; part – change affects one or more exons; whole – change affects the entire gene), sample size and chromosomal location

| Variation ID | ALDH | Type  | Gain/loss | Site   | Sample size<br>(variant/<br>controls) | Chr      |
|--------------|------|-------|-----------|--------|---------------------------------------|----------|
| 26310        | 16A1 | InDel | Gain      | Intron | 1/1                                   | 19q13.33 |
| 26311        | 16A1 | InDel | Gain      | Intron | 1/1                                   | 19q13.33 |
| 26312        | 16A1 | InDel | Gain      | Intron | 1/1                                   | 19q13.33 |
| 26313        | 16A1 | InDel | Loss      | Intron | 1/1                                   | 19q13.33 |
| 109892       | 1A1  | InDel | Gain      | Intron | 1/1                                   | 9q21.13  |
| 102109       | 1A2  | CNV   | Loss      | Intron | 1/1                                   | 15q22.1  |
| 25534        | 1A2  | InDel | Loss      | Intron | 1/1                                   | 15q22.1  |
| 40101        | 1A2  | InDel | Loss      | Intron | 1/1                                   | 15q22.1  |
| 41386        | 1A2  | InDel | Loss      | Intron | 1/1                                   | 15q22.1  |
| 45349        | 1A2  | InDel | Loss      | Intron | 1/1                                   | 15q22.1  |
| 45350        | 1A2  | InDel | Loss      | Intron | 1/1                                   | 15q22.1  |
| 102186       | 1A3  | CNV   | Loss      | Intron | 1/1                                   | 15q26.3  |
| 11819        | 1A3  | InDel | Loss      | Intron | 1/36                                  | 15q26.3  |
| 25599        | 1A3  | InDel | Loss      | Intron | 1/1                                   | 15q26.3  |
| 25600        | 1A3  | InDel | Loss      | Intron | 1/1                                   | 15q26.3  |
| 25601        | 1A3  | InDel | Loss      | Intron | 1/1                                   | 15q26.3  |
| 40124        | 1A3  | InDel | Loss      | Intron | 1/2                                   | 15q26.3  |
| 42429        | 1A3  | InDel | Loss      | Intron | 1/1                                   | 15q26.3  |
| 42898        | 1A3  | InDel | Loss      | Intron | 1/1                                   | 15q26.3  |
| 45395        | 1A3  | InDel | Loss      | Intron | 1/1                                   | 15q26.3  |
| 61482        | 1A3  | InDel | Loss      | Intron | 1/1                                   | 15q26.3  |
| 68446        | 1L1  | InDel | Loss      | Intron | 1/39                                  | 3q21.2   |
| 106822       | 1L2  | CNV   | Gain      | Intron | 1/1                                   | 12q23.3  |
| 42760        | 3A2  | InDel | Loss      | Intron | 1/1                                   | 17p11.2  |
| 24787        | 3B2  | InDel | Loss      | Intron | 1/1                                   | 11q13.2  |
| 44926        | 3B2  | InDel | Loss      | Intron | 1/1                                   | 11q13.2  |
| 81276        | 5A1  | InDel | Gain      | Intron | 1/90                                  | 6p22.2   |

Continued

Table S1. Continued

| Variation ID | ALDH | Type  | Gain/loss | Site   | Sample size<br>(variant/<br>controls) | Chr               |
|--------------|------|-------|-----------|--------|---------------------------------------|-------------------|
| 93550        | 5A1  | CNV   | Loss      | Intron | 2/90                                  | 6p22.2            |
| 99466        | 5A1  | CNV   | Loss      | Intron | 1/1                                   | 6p22.2            |
| 33982        | 7A1  | InDel | Gain      | Intron | 1/1                                   | 5q23.2            |
| 97538        | 9A1  | InDel | Gain      | Intron | 1/1                                   | 1q24.1            |
| 23991        | 9A1  | InDel | Gain      | Intron | 1/1                                   | 1q24.1            |
| 11004        | 9A1  | InDel | Loss      | Intron | 15/50                                 | 1q24.1            |
| 35661        | 16A1 | CNV   | Gain      | Part   | 1/1                                   | 19q13.33          |
| 114045       | 1A3  | CNV   | Gain      | Part   | 1/30                                  | 15q26.3           |
| 72379        | 1A3  | CNV   | Loss      | Part   | 1/39                                  | 15q26.3           |
| 4352         | 1L1  | CNV   | 2G 1L     | Part   | 3/95                                  | 3q21.2            |
| 59786        | 1L1  | Inv   | Inversion | Part   | 1/1                                   | 3q21.2            |
| 68445        | 1L1  | CNV   | Loss      | Part   | 1/39                                  | 3q21.2            |
| 107014       | 1L2  | CNV   | Loss      | Part   | 1/1                                   | 12q23.3           |
| 88379        | 3A2  | CNV   | Loss      | Part   | 1/90                                  | 17p11.2           |
| 88381        | 3A2  | CNV   | Loss      | Part   | 1/90                                  | 17p11.2           |
| 3140         | 3A2  | CNV   | Loss      | Part   | 4/270                                 | 17p11.2           |
| 65982        | 3B2  | CNV   | Gain      | Part   | 2/450                                 | 11q13.2           |
| 85827        | 3B2  | CNV   | Loss      | Part   | 2/90                                  | 11q13.2           |
| 53128        | 3B2  | CNV   | Loss      | Part   | 2/1064                                | 11q13.2           |
| 3055         | 6A1  | CNV   | Gain      | Part   | 1/270                                 | 14q24.3           |
| 66668        | 6A1  | CNV   | Loss      | Part   | 2/450                                 | 14q24.3           |
| 6793         | 9A1  | CNV   | Loss      | Part   | 2/50                                  | 1q24.1            |
| 3856         | 3B1  | CNV   | Gain/loss | Whole  | 3/270                                 | 11q13.2           |
| 113072       | 3B1  | CNV   | Gain      | Whole  | 1/30                                  | 11q13.2           |
| 30558        | 3B1  | CNV   | Gain      | Whole  | 1/1                                   | 11q13.2           |
| 5275         | 3B2  | CNV   | Gain      | Whole  | 1/272                                 | 11q13.1–11q13.2   |
| 5111         | 16A1 | CNV   | Loss      | Whole  | 25/95                                 | 19q13.33          |
| 32261        | 16A1 | CNV   | Loss      | Whole  | 18/30                                 | 19q13.32–19q13.33 |
| 5110         | 16A1 | CNV   | Loss      | Whole  | 4/95                                  | 19q13.33          |
| 2201         | 1A3  | CNV   | Loss      | Whole  | 3/269                                 | 15q26.3           |

Continued

**Table S1.** Continued

| Variation ID | ALDH       | Type | Gain/loss | Site  | Sample size<br>(variant/<br>controls) | Chr     |
|--------------|------------|------|-----------|-------|---------------------------------------|---------|
| 47939        | <i>1B1</i> | CNV  | Loss      | Whole | 6/2906                                | 9p13.1  |
| 30022        | <i>3A1</i> | CNV  | Loss      | Whole | 2/485                                 | 17p11.2 |
| 53160        | <i>3B1</i> | CNV  | Loss      | Whole | 2/1064                                | 11q13.2 |
| 2931         | <i>3B1</i> | CNV  | Loss      | Whole | 8/270                                 | 11q13.2 |
| 29913        | <i>3B1</i> | CNV  | Loss      | Whole | 1/485                                 | 11q13.2 |
| 29914        | <i>3B1</i> | CNV  | Loss      | Whole | 1/485                                 | 11q13.2 |
| 47969        | <i>5A1</i> | CNV  | Loss      | Whole | 9/2906                                | 6p22.2  |
